# Supplementary material
Source: ML conference proceedings conference paper supplement (https://proceedings.neurips.cc/paper_files/paper/2022/hash/249f73e01f0a2bb6c8d971b565f159a7-Abstract.html)
Supplement: Supplementary file 1 [file 249f73e01f0a2bb6c8d971b565f159a7-Supplemental-Conference.zip]

Archive with 8 entries (7 files):
- submission/
- __MACOSX/._submission
- submission/reporting_templates.tex
- __MACOSX/submission/._reporting_templates.tex
- submission/raw_data.zip
- __MACOSX/submission/._raw_data.zip
- submission/Supplementary_material.pdf
- __MACOSX/submission/._Supplementary_material.pdf
