# Supplementary material
Source: ML conference proceedings conference paper supplement (https://proceedings.neurips.cc/paper_files/paper/2022/hash/249f73e01f0a2bb6c8d971b565f159a7-Abstract.html)
Supplement: Supplementary file 1 [file 249f73e01f0a2bb6c8d971b565f159a7-Supplemental-Conference.zip › submission/reporting_templates.tex]

\begin{table}[H]
    \caption{Proposal for reporting experimental details}
    \label{tab:reporting-proposal}
    \centering
    \makebox[1 \textwidth][c]{ 
    \begin{tabular}{llll}
      \toprule
      \midrule
      \rowcolor{lightgray}
      \textbf{Experimental setup} &  \hspace{2em} \textbf{Algo 1} &  \hspace{7em} \textbf{Algo 2} &  \hspace{3em} \textbf{Algo 3} \\
      \midrule
      \rowcolor{Gray}
      \textbf{Hyperparameters} & & &   \\
      \midrule
      Discount factor & & & \\
      Batch size  & & & \\
      Replay buffer size  & & & \\
      Minimum replay buffer size before updating  &  & &\\
      N steps bootstrapping  & & &\\
      Target network update period  & & &\\
      $\epsilon$ schedule (Decay steps, $\epsilon$ start, $\epsilon$ min)  & & &\\
      Value Network architecture  & & & \\
      Value Network initializer  & & & \\
      Value Network Layer size  & & &\\
      Value Network Layer normalisation  & & & \\
      Mixing network (architecture, size, activation) & & & \\
      Hypernetworks (size, activation)  & & &\\
      Parameter sharing  & & &\\ 
      Parallel workers  & & &\\
      Seed range  & & &\\
      \midrule
      \rowcolor{Gray}
      \textbf{Code-level optimisations}  & &  &\\
      \midrule
      Optimiser (type, parameters)  & & &\\
      Learning rate  & & &\\
      Reward normalisation  & & &\\
      Death masking  & & &\\
      Clipped updates  & & &\\
      Eligibility trace  & & &\\
      $TD(\lambda)$ value & & &\\
      \midrule
      \rowcolor{Gray}
      \textbf{Computational resources} & & & \\
      Average Wall-clock time per algorithm  & & & \\
      CPUs per experiment  & & & \\
      GPU per experiment  & & & \\
      RAM per experiment  & & & \\
      \midrule
      \rowcolor{lightgray}
      \textbf{Evaluation protocol}  & & &  \\
      \midrule
      Total training (timesteps)  & & & \\
      Evaluation interval (timesteps)  & & & \\
      Independent evaluation episodes  & & & \\
      Absolute metric (evaluation episodes, aggregation method)  & & & \\
      Local aggregation method  & & & \\
      Global aggregation method  & & & \\
      Metrics [Environment 1 name ]    & & & \\
      Metrics [Environment 2 name ]    & & & \\
      Metrics [Environment 3 name ]    & & & \\
      Exploration behaviour   & & & \\
      \midrule
      \rowcolor{lightgray}
      \textbf{MARL Framework}& \multicolumn{3}{c}{name (version)} \\
      \midrule
      \rowcolor{lightgray}
      \textbf{Environment settings} & & & & \\
      \midrule
      \rowcolor{Gray}
      \textbf{Environment 1 name (version)} &  \textbf{Training}  & \textbf{In sample evaluation configs}  & \textbf{Out of sample evaluation configs}\\
      \midrule
      Env related configs & & &\\
      \midrule
      \rowcolor{Gray}
      \textbf{Environment 2 name (version)} &  \textbf{Training}  & \textbf{In sample evaluation configs}  & \textbf{Out of sample evaluation configs}\\
      \midrule
      Env related configs & & &\\
      \rowcolor{Gray}
      \textbf{Environment 3 name (version)} &  \textbf{Training}  & \textbf{In sample evaluation configs}  & \textbf{Out of sample evaluation configs}\\
      \midrule
      Env related configs & & &\\
     \bottomrule
   \end{tabular}}
   \end{table}
